# Supplementary material for: Analyzing the charge contributions of metal–organic framework derived nanosized cobalt nitride/carbon composites in asymmetrical supercapacitors
Source: Royal Society of Chemistry journal article supplement (doi:10.1039/d4na00291a), 2024-01-01
Supplement: d4na00291a1.pdf [file d4na00291a1.pdf]

## **Supporting Information**

### **Analyzing the charge contributions of metal-organic framework derived nanosized Cobalt Nitride/Carbon composites in asymmetrical supercapacitors**

Vishal Shrivastav<sup>1§\*</sup>, Mansi<sup>2§</sup>, Prashant Dubey<sup>3</sup>, Umesh K. Tiwari<sup>2</sup>, Akash Deep<sup>4</sup>, Wojciech Nogala<sup>1\*</sup>, and Shashank Sundriyal<sup>5\*</sup>

<sup>1</sup>Institute of Physical Chemistry Polish Academy of Sciences, Kasprzaka 44/52, 01-224 Warsaw, Poland;

<sup>2</sup>CSIR-Central Scientific Instruments Organisation, Sector 30-C, Chandigarh, 160030, India;

<sup>3</sup>Advanced Carbon Products and Metrology Department, CSIR-National Physical Laboratory (CSIR-NPL), New Delhi 110012, India;

<sup>4</sup>Institute of Nano Science and Technology (INST), Sector-81, Mohali, 140306 Punjab, India;

<sup>5</sup>Regional Center of Advanced Technologies and Materials, The Czech Advanced Technology and Research Institute (CATRIN), Palacký University Olomouc, Šlechtitelů 27, 779 00 Olomouc, Czech Republic;

**§Both authors contributed equally**

**\*Correspondence:** [shashank.sundriyal@upol.cz](mailto:shashank.sundriyal@upol.cz) (Dr. Shashank Sundriyal), [vshrivastav@ichf.edu.pl](mailto:vshrivastav@ichf.edu.pl) (Dr. Vishal Shrivastav), [wnogala@ichf.edu.pl](mailto:wnogala@ichf.edu.pl) (Dr. Wojciech Nogala)

### **S1. Characterization**

A Renishaw (Invia) system with a 532 nm laser source was used to record Raman spectra. A QuantachromeAsiQwin instrument monitored N<sub>2</sub> adsorption-desorption isotherm. X-ray diffractometer (XRD) of model Bruker, D8 Advance, CuK $\alpha$  source 1.54Å was used to capture XRD patterns. Thermal analyses were performed in open  $\alpha$ -Al<sub>2</sub>O<sub>3</sub> crucibles with a Netzsch STA 449C Jupiter instrument at a heating rate of 5 °C min<sup>-1</sup>, under Ar flow in the sample compartment. Hitachi SU8010 based Field emission scanning electron microscopy (FESEM)

with applied voltage of 2-5 kV has been used to record morphological images of the samples, Energy-dispersive X-ray spectroscopy (EDS) and elemental mapping. X-ray photoelectron spectroscopy is performed to determine different bonding with respect to different binding energies.

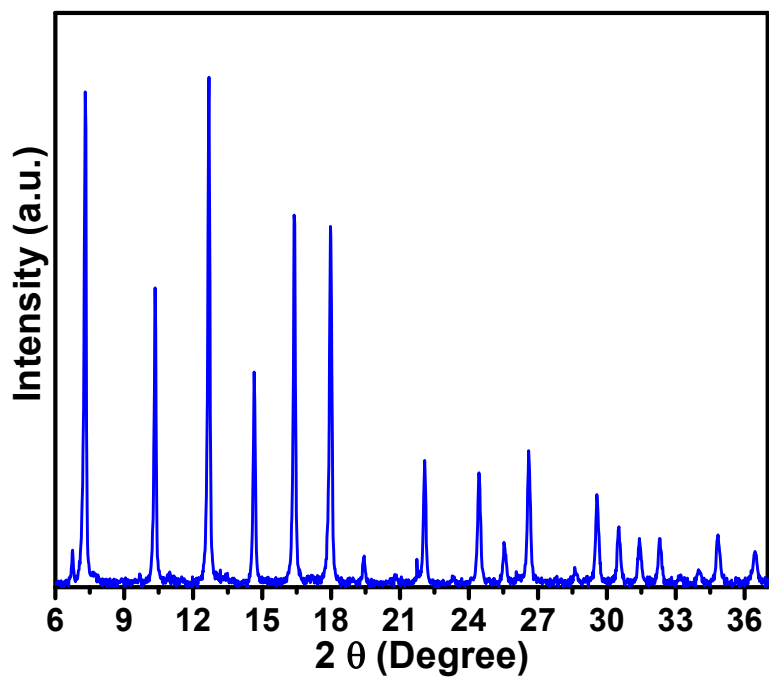

**Figure S1.** XRD pattern of ZIF-67.

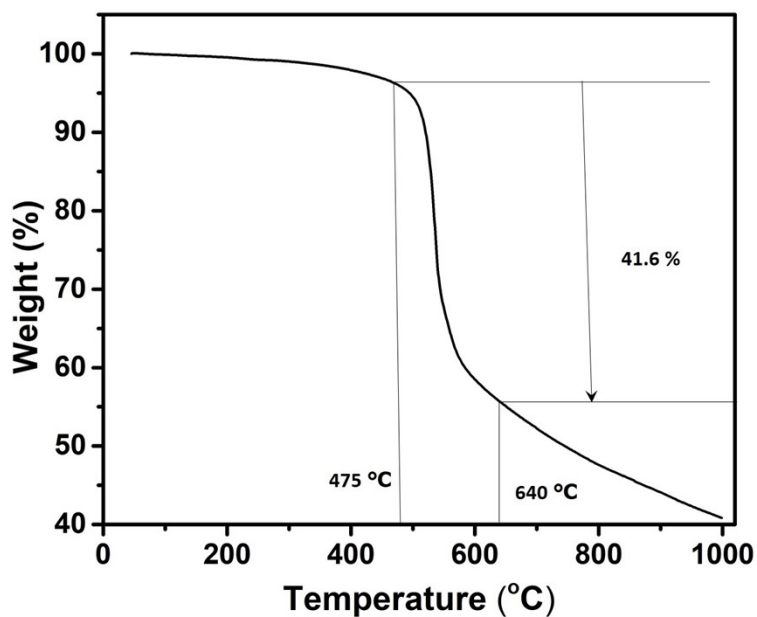

**Figure S2.** TGA of ZIF-67 from room temperature to 1000 °C under Ar atmosphere.

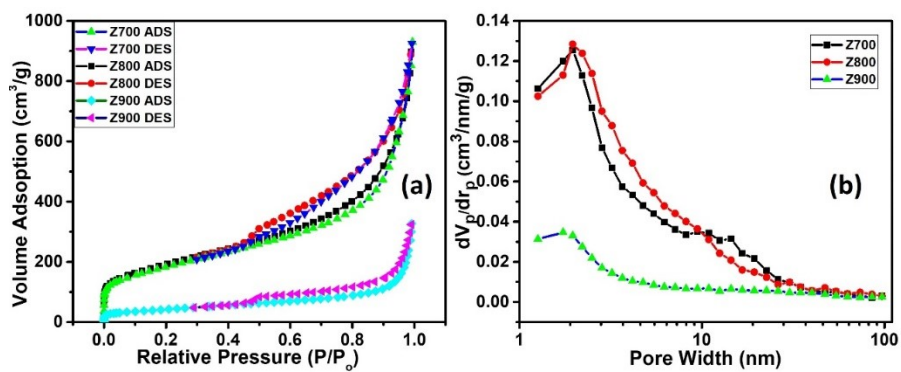

**Figure S3.** N<sub>2</sub> adsorption desorption isotherm and pore size distribution of Z-700, Z-800, and Z-900.

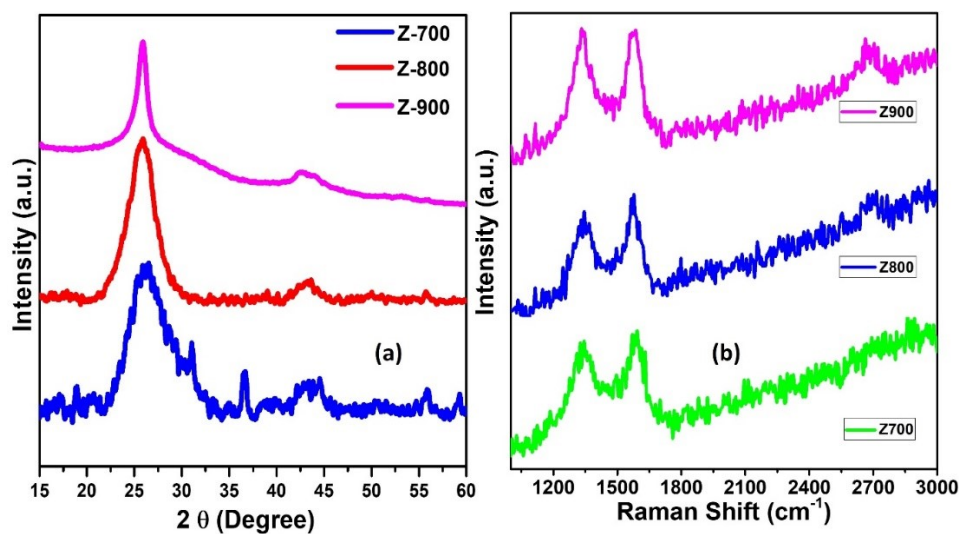

Figure S4. (a) XRD and (b) Raman spectra of Z-700, Z-800, and Z-900.

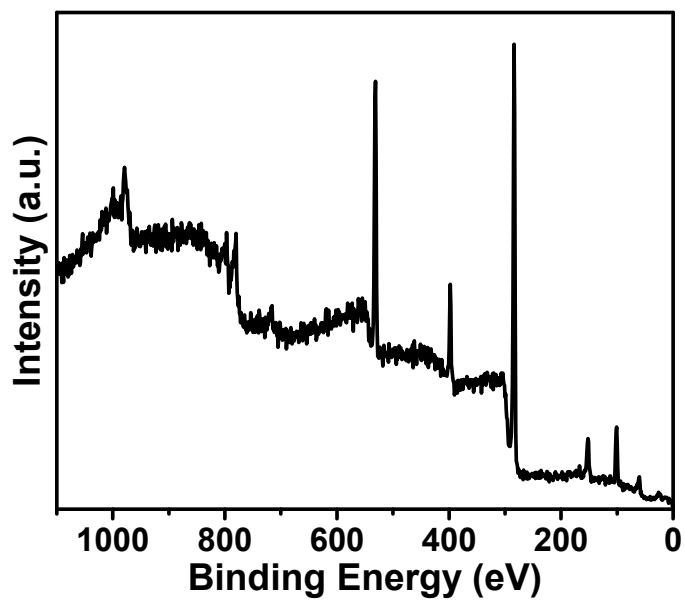

Figure S5. Survey scan of Co<sub>4</sub>N/carbon.

## S2. Calculations of electrochemical parameters

The calculation for specific capacitance from CV and GCD has been calculated using the following equations-

(i) Three-electrode system

For CV calculation [2],

$$C_s = \frac{1}{2ms\Delta V} \int_{V_i}^{V_f} I(V) dV \quad (S1)$$

where ( $\int IdV$ ) is the integral area of the CV curve, m is the mass of the active material,  $\Delta V$  is the potential window of the material and s is the scan rate under which CV has been performed.

For GCD calculation

$$C_s = \frac{\Delta t \times I_d}{m \times \Delta V} \quad (S2)$$

Where,  $\Delta t$  is the discharging time,  $I_d$  is the discharge current density, m is the mass of active materials on the electrode in g, and  $\Delta V$  is the voltage window.

(ii) Asymmetric Supercapacitor Device Calculation (two-electrode system)

For GCD calculation

$$C_s = \frac{\Delta t \times I_d}{mt \times \Delta V} \quad (S3)$$

Where,  $\Delta t$  is the discharging time,  $I_d$  is the discharge current density, mt is the total mass of positive and negative electrode materials in g, and  $\Delta V$  is the voltage window of the device.

The energy density and power density is calculated using the following formulae<sup>1</sup>,

$$E_s = \frac{C_s \times \Delta V_D^2}{2 \times 3.6} \quad (\text{S4})$$

$$P_s = \frac{E_s \times 3600}{\Delta t} \quad (\text{S5})$$

where,  $C_s$  = specific capacitance,  $\Delta t$  = discharging time,  $\Delta V$  = total potential deviation of the voltage window

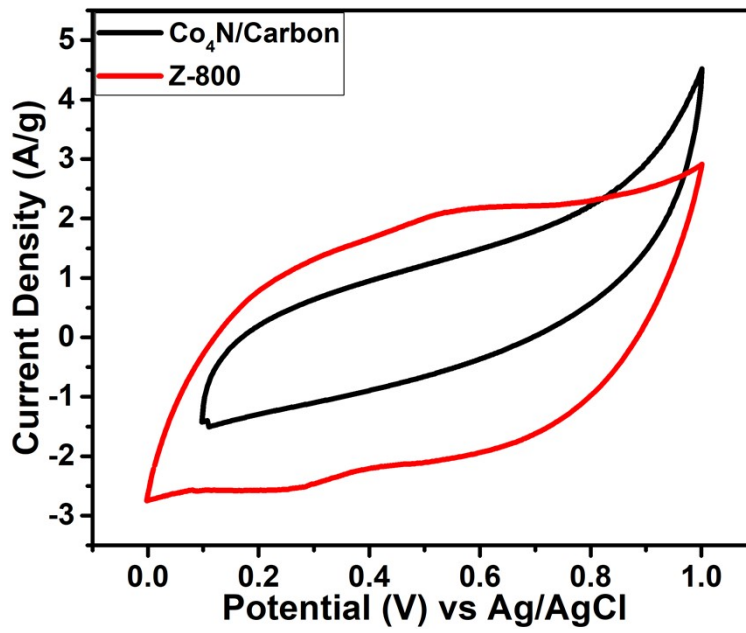

**Figure S6.** CV comparison of Co<sub>4</sub>N/carbon and Z8-800 in positive voltage range.

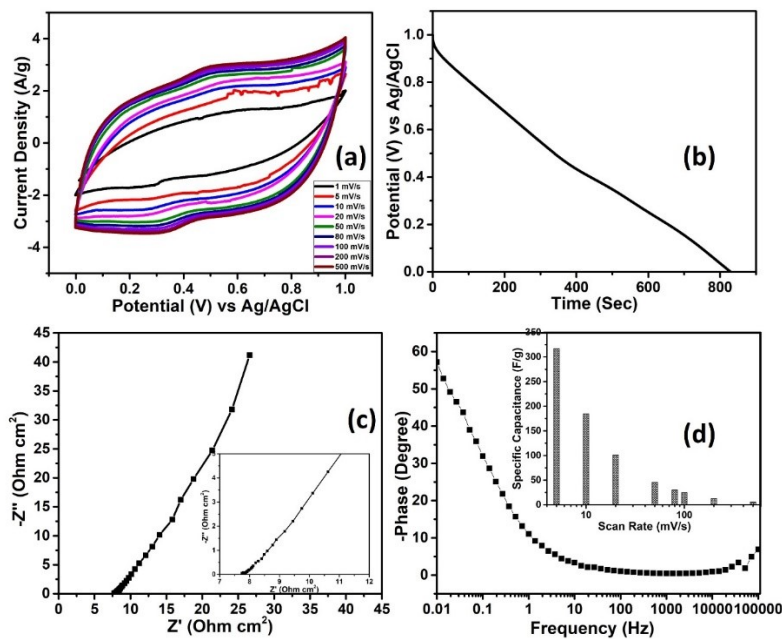

**Figure S7.** Electrochemical characterization of Z-800 electrode: (a) CV, (b) discharge curve, (c) Nyquist plot, and (d) Phase vs frequency plot (inset: capacitance vs scan rate).

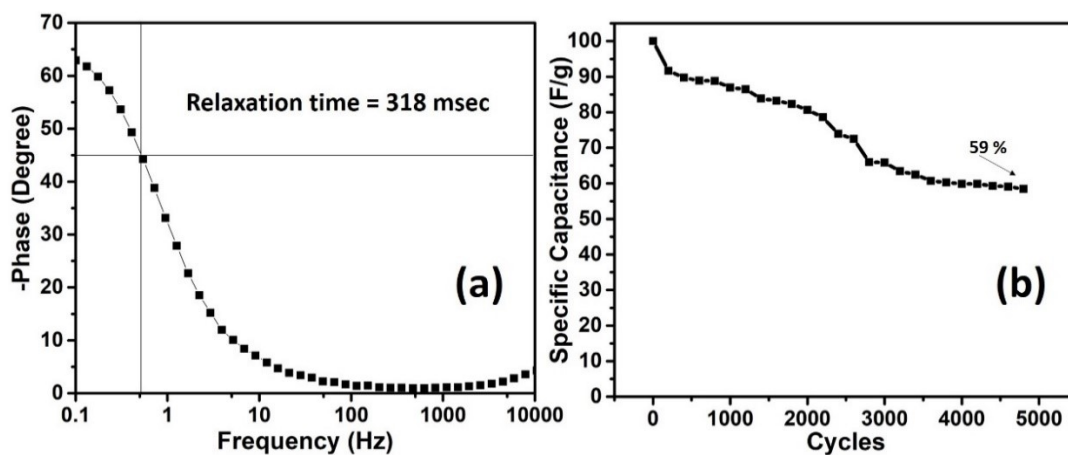

**Figure S8.** (a) Relaxation time of the  $\text{Co}_4\text{N}$ /carbon electrode from the phase vs frequency plot and (b) cyclic stability test of the  $\text{Co}_4\text{N}$ /carbon electrode.

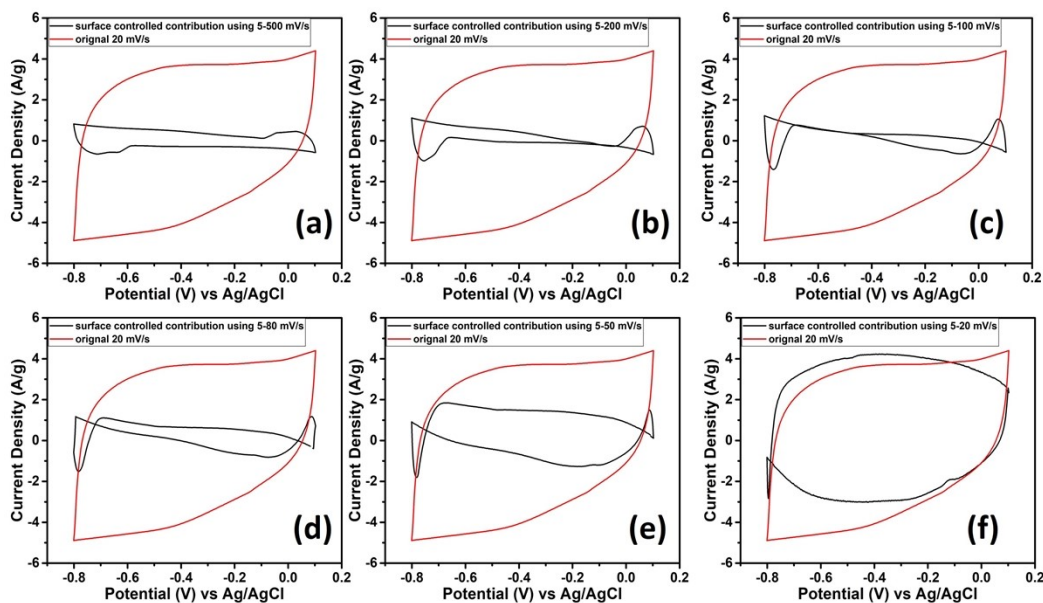

**Figure S9.** Comparison of original CV area of  $\text{Co}_4\text{N}/\text{carbon}$  and the area contributing surface-controlled reaction at 20 mV/s using different slope values using Dunn's method (a) using slope 5-500 mV/s, (b) using slope 5-200 mV/s, (c) using slope 5-100 mV/s, (d) using slope 5-80 mV/s, (e) using slope 5-50 mV/s, and (f) using slope 5-20 mV/s.

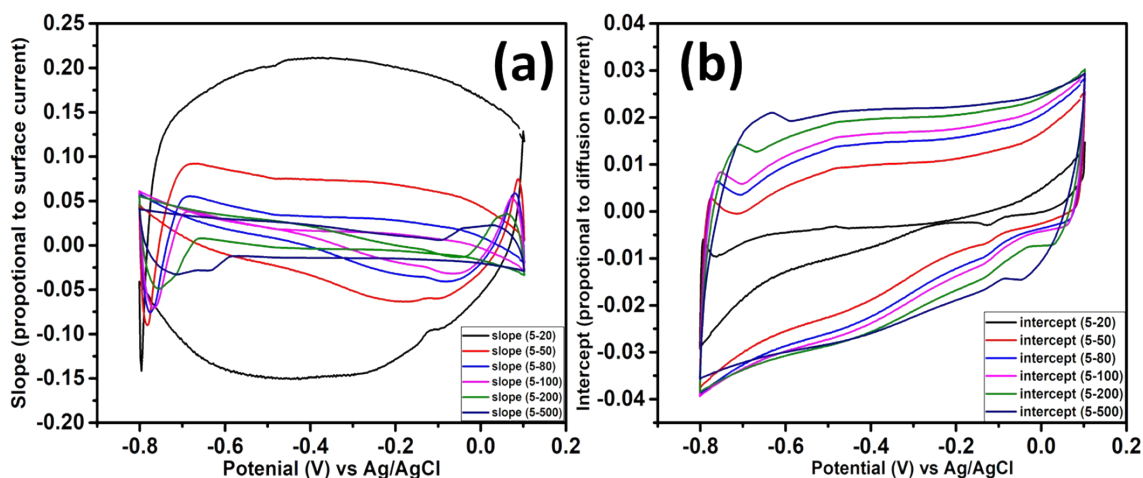

**Figure S10.** (a) Different slope (proportional to the surface contribution) calculated from different data sets, and (b) different intercept (proportional to the diffusion contribution).



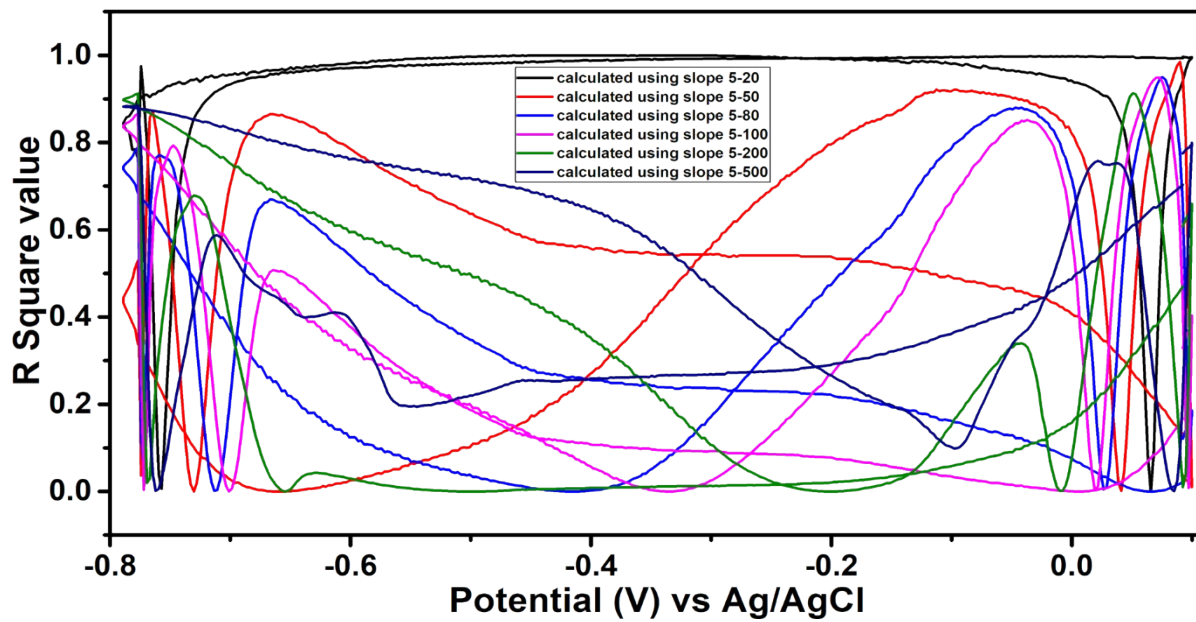

**Figure S11.**  $R^2$  value of the linear fitting using different scan rate ranges.

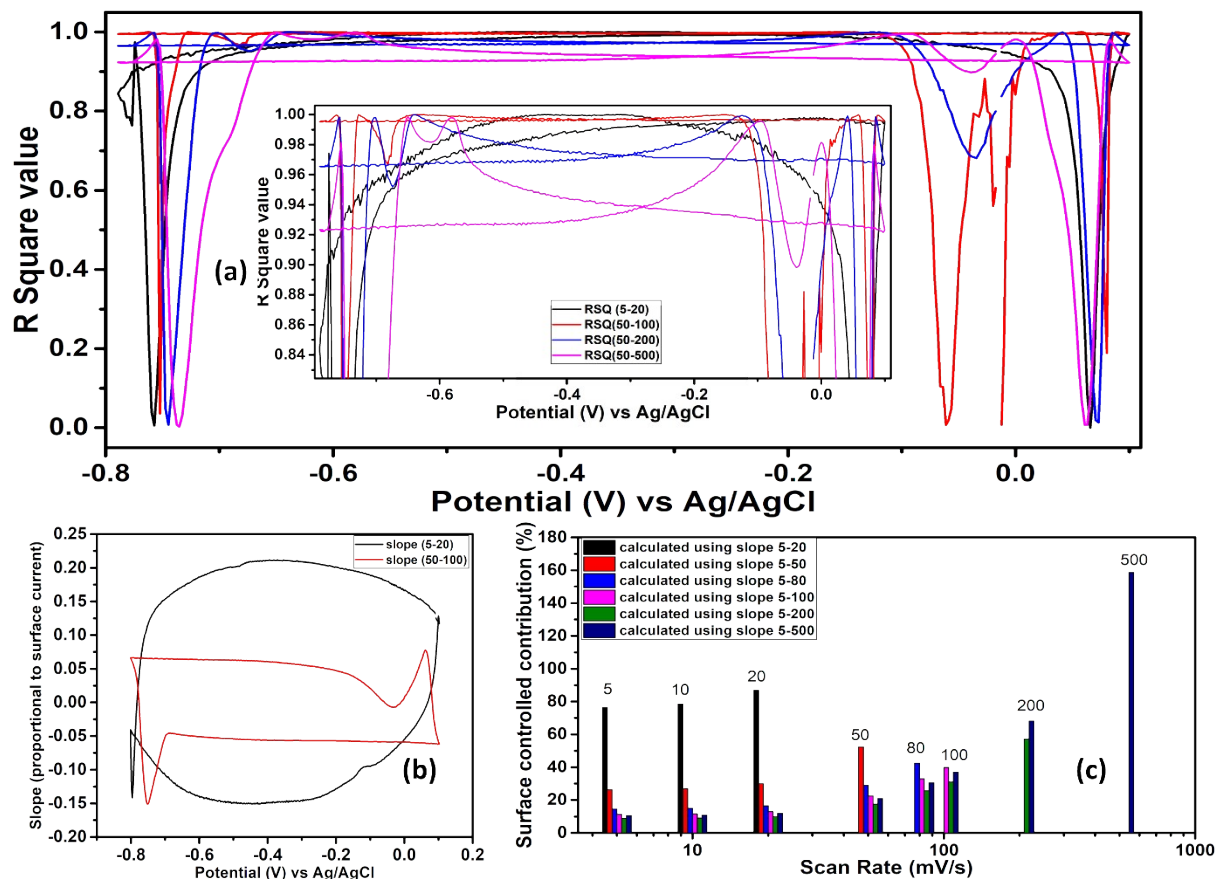

**Figure S12.** (a)  $R^2$  value of the linear fitting using 5-20, 50-100, 50-200, and 50-500 mV/s of CV data, (b) slope (proportional to the surface contribution) calculated for 5-20 and 50-100 mV/s of CV data set, and (c) surface contribution value calculated from slope of different data sets of CV.

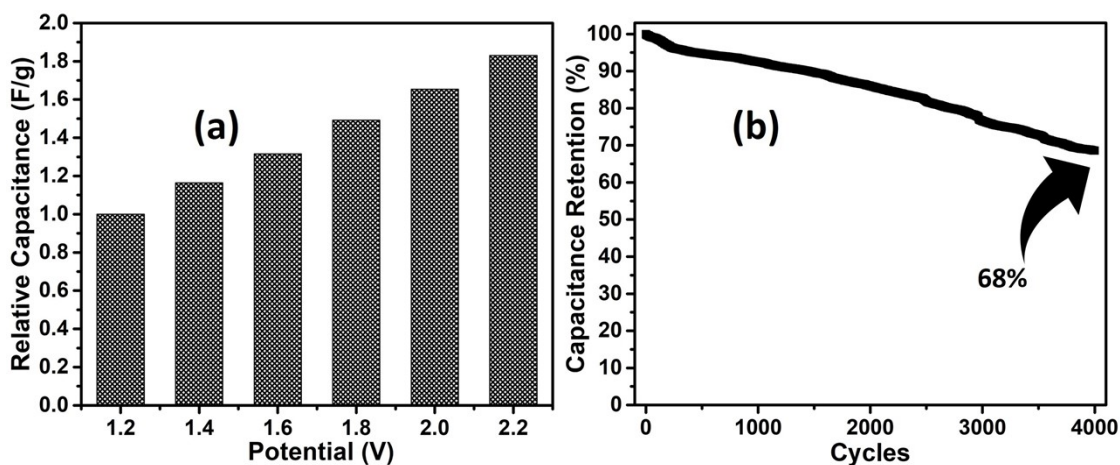

**Figure S13.** (a) Relative capacitance of the device in different voltage window range, and (b) cyclic stability.

**Table S1.** Comparison of different material's supercapacitor performance with this work.

| Supercapacitor Device                                                               | Electrolyte                           | Energy Density (Wh/kg) | Power Density (kW/kg) | Ref |
|-------------------------------------------------------------------------------------|---------------------------------------|------------------------|-----------------------|-----|
| MOF-derived Co(OH) <sub>2</sub> //AC                                                | 6 M KOH                               | 13.6                   | 0.14                  | 2   |
| MIL-100 (Fe) derived Fe <sub>3</sub> O <sub>4</sub> /Fe/C//MIL-100 (Al) derived NPC | 6 M KOH                               | 17.49                  | 0.388                 | 3   |
| Ni <sub>3</sub> S <sub>2</sub> /MWCNT-NC//AC                                        | 2 M KOH                               | 19.8                   | 0.798                 | 4   |
| ZIF-8/PANI                                                                          | 1 M H <sub>2</sub> SO <sub>4</sub>    | 21                     | 0.1                   | 5   |
| MOF derived NiO@400//AC                                                             | 3 M KOH                               | 21.4                   | 0.375                 | 6   |
| ZIF-8 derived AQ functionalized Carbon// NQ and TCNQ functionalized Carbon          | 1 M H <sub>2</sub> SO <sub>4</sub>    | 23.5                   | 0.7                   | 7   |
| ZIF-8 derived ZnO QDs/carbon/CNTs// N-doped carbon/CNTs                             | 1 M Na <sub>2</sub> SO <sub>4</sub>   | 26.8                   | 0.847                 | 8   |
| Ni-Zn-BDC derived NiS <sub>2</sub> /ZnS                                             | 3 M KOH                               | 28                     | 0.748                 | 9   |
| ZIF-67/PEDOT//ZIF-67/PEDOT                                                          | PVA/1M H <sub>2</sub> SO <sub>4</sub> | 11                     | 0.2                   | 10  |
| ZIF-8 derived NPC// ZIF-8 derived NPC                                               | 1M H <sub>2</sub> SO <sub>4</sub>     | 10.8                   | 0.22                  | 11  |
| Fe-MOF derived NPC/CNT// Fe-MOF derived NPC/CNT                                     | 1M H <sub>2</sub> SO <sub>4</sub>     | 18.8                   | 0.3                   | 12  |
| CNTs@Mn-MOF//CNTs@Mn-MOF                                                            | 1M Na <sub>2</sub> SO <sub>4</sub>    | 6.9                    | 0.122                 | 13  |

|                                                |                                    |      |       |           |
|------------------------------------------------|------------------------------------|------|-------|-----------|
| Cu-CAT/NWA// Cu-CAT/NWA                        | PVA/KCl                            | 2.6  | 0.2   | 14        |
| CNT@NiO//PCP derived from Zn-MOFs              | 1 M KOH                            | 25.4 | 0.4   | 15        |
| Ni doped MOF-5/rGO//Ni doped MOF-5/rGO         | 1M KOH                             | 37.8 | 0.227 | 16        |
| ZIF-67 derived Co <sub>4</sub> N/carbon//Z-800 | 1 M H <sub>2</sub> SO <sub>4</sub> | 26.6 | 0.36  | This work |

\*AQ= Anthraquinone, NQ= 1, 4-naphthoquinone, TCBQ= tetrachlorobenzoquinone

## References

- (1) Sundriyal, S.; Shrivastav, V.; Sharma, M.; Mishra, S.; Deep, A. Significantly Enhanced Performance of rGO/TiO<sub>2</sub> Nanosheet Composite Electrodes Based 1.8 V Symmetrical Supercapacitor with Use of Redox Additive Electrolyte. *Journal of Alloys and Compounds* **2019**, *790*, 377–387. <https://doi.org/10.1016/j.jallcom.2019.03.150>.
- (2) Wang, Z.; Liu, Y.; Gao, C.; Jiang, H.; Zhang, J. A Porous Co(OH)<sub>2</sub> Material Derived from a MOF Template and Its Superior Energy Storage Performance for Supercapacitors. *Journal of Materials Chemistry A* **2015**, *3* (41), 20658–20663. <https://doi.org/10.1039/C5TA04663G>.
- (3) Mahmood, A.; Zou, R.; Wang, Q.; Xia, W.; Tabassum, H.; Qiu, B.; Zhao, R. Nanostructured Electrode Materials Derived from Metal–Organic Framework Xerogels for High-Energy-Density Asymmetric Supercapacitor. *ACS Appl. Mater. Interfaces* **2016**, *8* (3), 2148–2157. <https://doi.org/10.1021/acsami.5b10725>.
- (4) Dai, C.-S.; Chien, P.-Y.; Lin, J.-Y.; Chou, S.-W.; Wu, W.-K.; Li, P.-H.; Wu, K.-Y.; Lin, T.-W. Hierarchically Structured Ni<sub>3</sub>S<sub>2</sub>/Carbon Nanotube Composites as High Performance Cathode Materials for Asymmetric Supercapacitors. *ACS Appl. Mater. Interfaces* **2013**, *5* (22), 12168–12174. <https://doi.org/10.1021/am404196s>.
- (5) R. Salunkhe, R.; Tang, J.; Kobayashi, N.; Kim, J.; Ide, Y.; Tominaka, S.; Ho Kim, J.; Yamauchi, Y. Ultrahigh Performance Supercapacitors Utilizing Core–Shell Nanoarchitectures from a Metal–Organic Framework-Derived Nanoporous Carbon and a Conducting Polymer. *Chemical Science* **2016**, *7* (9), 5704–5713. <https://doi.org/10.1039/C6SC01429A>.
- (6) Wu, M.; Chen, C.; Zhou, J.; Yi, F.; Tao, K.; Han, L. MOF–Derived Hollow Double–Shelled NiO Nanospheres for High–Performance Supercapacitors. *Journal of Alloys and Compounds* **2018**, *734*, 1–8. <https://doi.org/10.1016/j.jallcom.2017.10.171>.
- (7) Guo, B.; Yang, Y.; Hu, Z.; An, Y.; Zhang, Q.; Yang, X.; Wang, X.; Wu, H. Redox-Active Organic Molecules Functionalized Nitrogen-Doped Porous Carbon Derived from Metal–Organic Framework as Electrode Materials for Supercapacitor. *Electrochimica Acta* **2017**, *223*, 74–84. <https://doi.org/10.1016/j.electacta.2016.12.012>.
- (8) Zhang, Y.; Lin, B.; Wang, J.; Tian, J.; Sun, Y.; Zhang, X.; Yang, H. All-Solid-State Asymmetric Supercapacitors Based on ZnO Quantum Dots/Carbon/CNT and Porous N-Doped Carbon/CNT Electrodes Derived from a Single ZIF-8/CNT Template. *Journal of Materials Chemistry A* **2016**, *4* (26), 10282–10293. <https://doi.org/10.1039/C6TA03633C>.
- (9) Li, G.-C.; Liu, M.; Wu, M.-K.; Liu, P.-F.; Zhou, Z.; Zhu, S.-R.; Liu, R.; Han, L. MOF-Derived Self-Sacrificing Route to Hollow NiS<sub>2</sub>/ZnS Nanospheres for High Performance

- Supercapacitors. *RSC Advances* **2016**, *6* (105), 103517–103522. <https://doi.org/10.1039/C6RA23071G>.
- (10) Shrivastav, V.; Sundriyal, S.; Kaur, A.; Tiwari, U. K.; Mishra, S.; Deep, A. Conductive and Porous ZIF-67/PEDOT Hybrid Composite as Superior Electrode for All-Solid-State Symmetrical Supercapacitors. *Journal of Alloys and Compounds* **2020**, *843*, 155992. <https://doi.org/10.1016/j.jallcom.2020.155992>.
- (11) Salunkhe, R. R.; Kamachi, Y.; Torad, N. L.; Hwang, S. M.; Sun, Z.; Dou, S. X.; Kim, J. H.; Yamauchi, Y. Fabrication of Symmetric Supercapacitors Based on MOF-Derived Nanoporous Carbons. *J. Mater. Chem. A* **2014**, *2* (46), 19848–19854. <https://doi.org/10.1039/C4TA04277H>.
- (12) Yu, C.; Li, H.; Luo, J.; Zheng, M.; Zhong, W.; Yang, W. Metal-Organic Coordination Polymer/Multi-Walled Carbon Nanotubes Composites to Prepare N-Doped Hierarchical Porous Carbon for High Performance Supercapacitors. *Electrochimica Acta* **2018**, *284*, 69–79. <https://doi.org/10.1016/j.electacta.2018.07.176>.
- (13) Zhang, Y.; Lin, B.; Sun, Y.; Zhang, X.; Yang, H.; Wang, J. Carbon Nanotubes@metal–Organic Frameworks as Mn-Based Symmetrical Supercapacitor Electrodes for Enhanced Charge Storage. *RSC Adv.* **2015**, *5* (72), 58100–58106. <https://doi.org/10.1039/C5RA11597C>.
- (14) Li, W.-H.; Ding, K.; Tian, H.-R.; Yao, M.-S.; Nath, B.; Deng, W.-H.; Wang, Y.; Xu, G. Conductive Metal-Organic Framework Nanowire Array Electrodes for High-Performance Solid-State Supercapacitors. *Adv. Funct. Mater.* **2017**, *27* (27), 1702067. <https://doi.org/10.1002/adfm.201702067>.
- (15) Yi, H.; Wang, H.; Jing, Y.; Peng, T.; Wang, X. Asymmetric Supercapacitors Based on Carbon nanotubes@NiO Ultrathin Nanosheets Core-Shell Composites and MOF-Derived Porous Carbon Polyhedrons with Super-Long Cycle Life. *Journal of Power Sources* **2015**, *285*, 281–290. <https://doi.org/10.1016/j.jpowsour.2015.03.106>.
- (16) Banerjee, P. C.; Lobo, D. E.; Middag, R.; Ng, W. K.; Shaibani, M. E.; Majumder, M. Electrochemical Capacitance of Ni-Doped Metal Organic Framework and Reduced Graphene Oxide Composites: More than the Sum of Its Parts. *ACS Appl. Mater. Interfaces* **2015**, *7* (6), 3655–3664. <https://doi.org/10.1021/am508119c>.
